# Supplementary material
Source: Royal Society of Chemistry journal article supplement (doi:10.1039/d6ja00129g)
Supplement: d6ja00129g1.xlsx [file d6ja00129g1.xlsx]

## Sheet: Table1
Table 1. Relative deviations of Standard Reference Material concentrations from recommended values at a 50 μm ablation area
Sample ID	Sample Name	Li	Na	Mg	Al	Si	K	Ca	Sc	Ti	V	Mn	Fe	Co	Ni	Rb	Y	Nb	Ba	Th	U		Detection Limit	Li	Na	Mg	Al	Si	K	Ca	Sc	Ti	V	Mn	Fe	Co	Ni	Rb	Y	Nb	Ba	Th	U
		ppm	ppm	ppm	ppm	ppm	ppm	ppm	ppm	ppm	ppm	ppm	ppm	ppm	ppm	ppm	ppm	ppm	ppm	ppm	ppm			ppm	ppm	ppm	ppm	ppm	ppm	ppm	ppm	ppm	ppm	ppm	ppm	ppm	ppm	ppm	ppm	ppm	ppm	ppm	ppm
1	NIST610-1	464.1	98072	435.7	10953	329311	451.6	75763	440.7	434.9	429.1	427	450.2	392.8	452.2	421.6	465.8	460.6	437.1	457.4	454.5		NIST610-1	0.1403	5.643	0.1025	0.5225	432.4	1.792	17.27	0.05928	0.8879	0.01856	0.1367	2.155	0.06902	0.2307	0.08874	0.0119	0.006343	0.06906	0.05841	0.05568
14	NIST610-2	465	100367	471.2	9994	325057	485.4	80532	451.5	463	447.9	455.3	463	417.8	460.3	422.6	473.8	496.1	441.9	464.2	461.8		NIST610-2	0.1781	5.659	0.32	0.508	475.9	1.988	23.56	0.0954	0.9125	0.01799	0.1564	2.6	0.08317	0.231	0.1025	0.01351	0.01909	0.02956	0.0663	0.0632
27	NIST610-3	475.7	100452	468.6	10127	325416	479.5	79787	449.5	465.1	443.7	450.5	460.2	409.6	457.9	421.9	466.8	479.6	438.6	459.3	469		NIST610-3	0.2599	4.8	0.121	0.4977	618.5	2.129	21.65	0.1122	1.049	0.02041	0.221	3.214	0.07271	0.3545	0.08632	0.01433	0.007717	0.08419	0.06533	0.06239
40	NIST610-4	461.3	98713	451.3	9935	327187	479.6	78943	450.8	456	440.5	446.7	470.1	407.3	459.3	419.9	461.3	459.8	439	462.8	457.1		NIST610-4	0.1989	6.184	0.1319	0.5214	492.2	2.127	25.06	0.1017	1.093	0.0154	0.1585	2.918	0.0719	0.2538	0.1398	0.01446	0.02073	0.08417	0.06348	0.02302
55	NIST610-5	460.2	100263	461.2	9865	325168	481.2	81193	449.4	465.4	446.4	444.7	459	409	460.8	426.6	469.6	481.2	435.5	470.5	463.3		NIST610-5	0.1366	6.023	0.1133	0.6662	494.6	2.008	19.68	0.1036	0.7555	0.01977	0.1733	2.382	0.0686	0.352	0.08085	0.01515	0.02156	0.03301	0.06521	0.06178
	Average	465.26	99573.4	457.6	10174.8	326428	475.46	79243.6	448.38	456.88	441.52	444.84	460.5	407.3	458.1	422.52	467.46	475.46	438.42	462.84	461.14		Average	0.18276	5.6618	0.15774	0.54316	502.72	2.0088	21.444	0.094436	0.93958	0.018426	0.16918	2.6538	0.07308	0.2844	0.099642	0.01387	0.015088	0.059998	0.063746	0.053214
	2SD	11.0161	1974.19	25.8955	797.019	3271.59	24.2407	3790.55	7.84184	23.0045	13.4035	19.2498	12.8636	16.2155	6.22383	4.44954	8.29033	27.454	4.26596	9.0621	10.0913
	Recommended Value¹	468	99410	432	10321	325810	464	81475	455	452	450	444	458	410	458.7	425.7	462	465	452	457.2	461.5
	Relative Deviation (%)	-0.58547	0.16437	5.92593	-1.41653	0.18962	2.46983	-2.73875	-1.45495	1.07965	-1.88444	0.189189	0.545852	-0.658537	-0.130804	-0.747005	1.18182	2.24946	-3.00442	1.2336	-0.0780065
2	NIST612-1	40.11	101886	58.58	10236	338661	69.27	82682	37.22	43.02	39.92	38.96	51.22	35.88	39.46	32.32	37	39.32	39.35	37.93	39.82		NIST612-1	0.2115	6.672	0.1532	0.7454	795.4	1.692	23.56	0.0941	1.049	0.02298	0.2085	3.391	0.08151	0.2971	0.08929	0.01508	0.02131	0.0875	0.074	0.07054
15	NIST612-2	39.85	104770	61.03	10197	336412	66.39	83308	35.69	39.95	38.33	38.75	44.64	34.4	38.02	31.67	37	40.13	36.55	36.08	37.69		NIST612-2	0.2847	7.393	0.172	0.8365	689.5	2.01	26.19	0.1281	1.079	0.03285	0.233	3.395	0.1018	0.4006	0.1091	0.01782	0.02519	0.039	0.03298	0.08337
28	NIST612-3	40.23	102442	59.99	10395	337880	67.39	83158	36.1	37.91	37.97	39.01	50.73	34.97	38.31	32.19	37.52	39.32	37.87	37.7	35.66		NIST612-3	0.2501	6.585	0.1658	0.8224	837.3	2.334	22.87	0.1372	0.9397	0.02421	0.2257	3.781	0.1013	0.4643	0.1152	0.01716	0.02451	0.1008	0.07824	0.07472
41	NIST612-4	40.23	103309	59.69	10298	337307	66.5	83183	37.09	41.59	38.97	38.91	52.83	35.38	39.06	31.58	37.74	37.96	37.88	37.47	38.4		NIST612-4	0.2627	7.859	0.2106	0.8741	622.9	2.282	25.38	0.1063	1.033	0.02061	0.1641	3.303	0.08219	0.4719	0.1323	0.006686	0.02541	0.1032	0.07784	0.07484
54	NIST612-5	39.15	103322	62.72	10504	337098	68.08	83384	35.74	38.01	38.65	38.66	38.93	35.3	38.31	30.96	36.6	39.54	37.56	36.95	36.97		NIST612-5	0.221	6.481	0.161	0.9973	599.1	2.478	26.47	0.1231	1.009	0.03142	0.1914	3.659	0.1286	0.4969	0.1266	0.006954	0.02624	0.1066	0.07937	0.0752
	Average	39.914	103146	60.402	10326	337472	67.526	83143	36.368	40.096	38.768	38.858	47.67	35.186	38.632	31.744	37.172	39.254	37.842	37.226	37.708		Average	0.246	6.998	0.17252	0.85514	708.84	2.1592	24.894	0.11776	1.02194	0.026414	0.20454	3.5058	0.09908	0.42616	0.114498	0.01274	0.024532	0.08742	0.068486	0.075734
	2SD	0.812857	1955.12	2.79484	222.657	1515.49	2.13731	489.614	1.31851	3.99331	1.32981	0.263939	10.3599	0.978456	1.07729	0.970658	0.814901	1.42333	1.79445	1.31737	2.78261
	Recommended Value²	40.2	101635	68	10744	337028	62.3	85049	39.9	44	38.8	38.7	51	35.5	38.8	31.4	38.3	38.9	39.3	37.79	37.38
	Relative Deviation (%)	-0.711443	1.4865	-11.1735	-3.89054	0.131621	8.38844	-2.24106	-8.85213	-8.87273	-0.0824742	0.408269	-6.52941	-0.884507	-0.43299	1.09554	-2.94517	0.910026	-3.70992	-1.49246	0.877475
8	NIST614-1	1.639	103474	29.65	9780	334864	34.51	87777	0.9934	1.083	1.059	1.556	11.18	0.7455	0.7758	0.9625	0.6874	0.6697	2.837	0.7155	0.961		NIST614-1	0.2554	7.063	0.1283	0.5001	379.5	2.16	23.19	0.1239	0.8601	0.02348	0.2087	2.11	0.07034	0.3478	0.09018	0.01412	0.01995	0.08192	0.06929	0.06605
13	NIST614-2	1.807	104366	29.03	10598	336616	35.62	83053	0.9372	3.697	0.9584	1.162	7.932	0.6226	1.039	0.8324	0.7138	0.6204	3.3	0.6604	0.5986		NIST614-2	0.2786	7.29	0.1229	0.4844	403.3	2.213	24.42	0.0785	0.921	0.01828	0.2117	2.468	0.09014	0.3726	0.1153	0.01501	0.01112	0.08708	0.07366	0.07021
21	NIST614-3	1.904	103093	30.37	10116	336695	33.94	84793	0.959	2.033	1.117	0.8439	10.92	0.6763	0.9585	1.12	0.7158	0.8097	2.708	0.5807	0.8491		NIST614-3	0.1808	6.272	0.1354	0.7734	643.5	2.205	23.37	0.1197	0.9318	0.0233	0.1691	3.162	0.07354	0.4251	0.0903	0.01539	0.00829	0.09043	0.07018	0.06702
26	NIST614-4	1.509	102149	28.13	10271	338273	33.8	83114	0.8012	0.8126	1.254	1.418	12.36	0.6713	0.7217	0.6855	0.7081	0.8451	2.623	0.7975	0.9233		NIST614-4	0.1961	7.262	0.1263	0.7452	540.6	2.095	24.56	0.09972	1.091	0.02105	0.189	2.728	0.07923	0.3315	0.09862	0.01493	0.02131	0.08769	0.06805	0.06499
34	NIST614-5	1.617	102580	29.36	10405	337617	37.94	83499	0.7641	3.365	1.02	1.269	12.62	0.5871	1.013	0.6961	0.7825	0.8335	2.999	0.5098	0.6619		NIST614-5	0.1744	7.341	0.1003	0.8342	403	2.245	24.26	0.1158	0.7867	0.01784	0.1731	2.659	0.07556	0.3703	0.1165	0.005756	0.02188	0.08885	0.06701	0.0243
39	NIST614-6	1.661	101624	29.66	10373	338743	34.11	82837	0.8069	2.075	1.186	1.54	13.01	0.5851	0.4984	0.9144	0.6919	0.815	2.742	0.5991	0.923		NIST614-6	0.1897	5.142	0.137	0.8125	643.4	2.347	18.91	0.1048	1.23	0.0214	0.1993	3.099	0.09375	0.3667	0.1049	0.01564	0.02243	0.09107	0.06869	0.06604
47	NIST614-7	1.755	103433	30.1	10266	336828	35.37	84111	0.9779	1.155	0.9411	1.583	15.23	0.6046	1.452	0.7961	0.7745	0.8225	3.182	0.5172	0.7529		NIST614-7	0.1981	7.052	0.1976	0.7748	491.9	2.186	23.4	0.1252	1.172	0.01764	0.1389	2.927	0.05688	0.3299	0.1191	0.0161	0.02291	0.03509	0.06931	0.06567
52	NIST614-8	1.644	100400	28.51	10484	339968	34.39	81991	0.815	2.194	1.198	1.656	8.827	0.7575	1.04	0.5247	0.6906	0.6983	2.598	0.5345	0.7763		NIST614-8	0.1885	7.764	0.1359	0.6719	382.5	2.19	23.9	0.09956	0.7889	0.02627	0.2099	2.797	0.09775	0.326	0.1223	0.01598	0.02274	0.09237	0.06881	0.06519
	Average	1.692	102640	29.3513	10286.6	337450	34.96	83896.9	0.881838	2.05183	1.09169	1.37849	11.5099	0.65625	0.9373	0.816463	0.720575	0.764275	2.87362	0.614337	0.805763		Average	0.2077	6.89825	0.135462	0.699562	485.963	2.20512	23.2513	0.108397	0.972688	0.0211575	0.187463	2.74375	0.0796488	0.358738	0.10715	0.0141157	0.0188287	0.0818125	0.069375	0.0611837
	2SD	0.231653	2324.14	1.42925	471.082	2920.38	2.56125	3327.41	0.174844	1.96605	0.216602	0.511192	4.38751	0.127455	0.527819	0.346761	0.0699581	0.163323	0.488615	0.192361	0.245776
	Recommended Value³	1.69	101635	33.8	10797	337028	30	85049	0.74	3.61	1.01	1.42	18.8	0.79	1.1	0.855	0.79	0.824	3.2	0.748	0.823
	Relative Deviation (%)	0.118343	0.98871	-13.162	-4.72701	0.125361	16.5333	-1.35466	19.1672	-43.1627	8.08787	-2.92342	-38.7773	-16.9304	-14.7909	-4.50731	-8.78797	-7.24818	-10.1992	-17.8693	-2.09447
3	BCR-2G-1	9.236	23392	21338	77111	247071	14385	53911	36.81	14494	436.4	1551	95610	38.53	11.43	47.5	36.9	12.43	681.4	6.492	1.436		BCR-2G-1	0.282	10.54	0.2087	0.8094	1092	2.907	35.19	0.1583	1.384	0.02181	0.2336	5.324	0.1055	0.4678	0.1604	0.02042	0.01089	0.1185	0.1002	0.09555
16	BCR-2G-2	9.923	23353	21969	75701	247130	14551	53693	35.27	14449	436.3	1573	96743	37.53	12.66	46.33	37.2	13.64	684.3	7.209	1.754		BCR-2G-2	0.2624	9.523	0.1745	0.872	886	3.105	25.98	0.1859	1.517	0.03028	0.2841	3.984	0.1489	0.6068	0.1695	0.02274	0.03214	0.04976	0.1116	0.1064
29	BCR-2G-3	8.855	23421	22145	76103	247466	14569	53424	36.24	14393	419.4	1566	95811	38.39	12.33	45.56	36.12	12.56	688.9	6.133	1.419		BCR-2G-3	0.4021	9.021	0.1466	0.7918	791.2	3.128	41.71	0.1064	1.738	0.03029	0.2771	5.1	0.1554	0.5494	0.1324	0.02304	0.03291	0.1354	0.1051	0.1003
42	BCR-2G-4	9.882	23574	22079	76657	245831	14402	54567	36	14327	441.2	1586	96338	38.66	11.08	47.09	37.61	12.28	689	6.813	1.749		BCR-2G-4	0.2511	11.68	0.2689	1.332	824.5	3.172	36.94	0.162	1.288	0.02821	0.291	3.7	0.1405	0.6656	0.1642	0.02364	0.03389	0.07214	0.1038	0.05231
53	BCR-2G-5	8.754	23283	21896	78833	245081	14344	53949	35.57	14433	423	1530	95988	37.15	12.02	45.84	37.47	12.99	678.5	6.078	1.607		BCR-2G-5	0.3194	9.975	0.263	1.245	956.4	3.137	30.7	0.129	1.405	0.01649	0.2737	4.47	0.1277	0.5425	0.1374	0.02379	0.03385	0.1375	0.1024	0.03659
	Average	9.33	23404.6	21885.4	76881	246516	14450.2	53908.8	35.978	14419.2	431.26	1561.2	96098	38.052	11.904	46.464	37.06	12.78	684.42	6.545	1.593		Average	0.3034	10.1478	0.21234	1.01004	910.02	3.0898	34.104	0.14832	1.4664	0.025416	0.2719	4.5156	0.1356	0.56642	0.15278	0.022726	0.028736	0.10266	0.10462	0.07823
	2SD	0.988975	193.025	573.844	2174.59	1814.6	183.58	757.073	1.06924	112.644	16.9591	38.5206	803.113	1.19949	1.1559	1.46689	1.05807	0.981672	8.25726	0.850112	0.290349
	Recommended Value⁴	9	23962	21468	70921	254290	14900	50458	33	14100	425	1550	96387	38	13	47	35	12.5	683	5.9	1.69
	Relative Deviation (%)	3.66667	-2.32618	1.94429	8.40372	-3.05722	-3.01879	6.83896	9.02424	2.26383	1.47294	0.722581	-0.299833	0.136842	-8.43077	-1.14043	5.88571	2.24	0.207906	10.9322	-5.73964
4	BHVO-2G-1	4.163	16579	43506	75942	225587	4259	87402	35.09	17690	337.8	1350	86551	46.02	122.5	9.291	26.73	18.38	132.5	1.597	0.5035		BHVO-2G-1	0.271	12.28	0.2006	1.058	1137	3.658	35.29	0.1446	1.565	0.02812	0.4389	4.307	0.134	0.6976	0.1598	0.02453	0.03467	0.1074	0.1204	0.1148
9	BHVO-2G-2	3.765	16716	43557	71610	227062	4375	89246	34.92	17979	344.6	1357	87286	46.18	129.6	9.719	26.52	18.18	130	1.327	0.5162		BHVO-2G-2	0.3902	11.51	0.2443	1.002	904.4	3.553	46.78	0.1658	1.499	0.02906	0.342	5.305	0.1674	0.5092	0.1971	0.02535	0.01351	0.1471	0.1244	0.1186
17	BHVO-2G-3	4.415	16616	44212	77086	227864	4223	83694	33.38	17023	325.4	1299	85181	44.09	117.2	8.823	26.3	18.84	130.3	0.9513	0.3582		BHVO-2G-3	0.3958	11.4	0.2512	0.781	1006	3.193	35.17	0.1996	1.25	0.03292	0.2614	3.705	0.1692	0.6783	0.1371	0.009658	0.03657	0.05674	0.1168	0.1115
22	BHVO-2G-4	4.345	16597	43997	76963	227642	4303	84631	33.32	17114	324.3	1306	84806	44.51	118.4	9.276	26.21	18.76	125.6	1.188	0.381		BHVO-2G-4	0.3061	12.3	0.2632	1.268	998.2	3.342	34.72	0.1968	2.101	0.02575	0.3843	5.164	0.1346	0.755	0.1526	0.02643	0.01423	0.05855	0.1205	0.1151
30	BHVO-2G-5	3.413	16658	44027	77583	228439	4328	84460	34.27	17049	320.1	1299	82907	44.8	115	8.923	26.94	18.34	130.5	0.7509	0.4375		BHVO-2G-5	0.314	11.25	0.2934	1.236	1018	3.936	38.64	0.2063	1.373	0.01455	0.3568	5.572	0.1289	0.6206	0.1859	0.02803	0.01516	0.1632	0.1231	0.1183
35	BHVO-2G-6	4.508	16706	43393	78409	227693	4337	84108	32.8	17244	321.2	1309	83671	44.25	115.9	9.102	25.15	18.98	129.2	1.116	0.412		BHVO-2G-6	0.3697	14.06	0.3022	1.723	1100	3.113	40.84	0.1769	1.522	0.03021	0.3484	6.585	0.1252	0.7303	0.205	0.01069	0.04065	0.1651	0.1245	0.1197
43	BHVO-2G-7	3.699	16576	43096	75952	229808	4348	85842	33.89	17182	325.4	1313	82607	45.53	117.3	8.674	26.55	17.42	128.4	1.216	0.4056		BHVO-2G-7	0.3265	12.91	0.2331	1.754	1140	2.606	48.94	0.1771	1.647	0.02724	0.3739	6.24	0.1514	0.6157	0.1908	0.02807	0.03994	0.1622	0.1208	0.04317
48	BHVO-2G-8	4.319	16796	43623	75933	229547	4362	85777	34.46	16931	329.1	1308	82516	45.11	114.8	9.326	26.42	18.31	128.1	1.45	0.4082		BHVO-2G-8	0.3611	13.89	0.3291	1.075	1109	4.006	33.56	0.1704	1.45	0.03633	0.2846	5.532	0.1292	0.642	0.1769	0.02948	0.04195	0.1704	0.1269	0.1202
	Average	4.07838	16655.5	43676.4	76184.8	227955	4316.88	85645	34.0162	17276.5	328.488	1317.62	84440.6	45.0613	118.838	9.14175	26.3525	18.4013	129.325	1.19952	0.427775		Average	0.3418	12.45	0.264638	1.23712	1051.58	3.42588	39.2425	0.179688	1.55088	0.0280225	0.348788	5.30125	0.142487	0.656088	0.17565	0.0227798	0.029585	0.128836	0.122175	0.107671
	2SD	0.747963	146.82	698.533	3835.7	2528.05	98.1501	3515.09	1.51918	684.204	15.9181	42.5198	3408.97	1.47758	9.3311	0.623413	1.00706	0.916648	3.81543	0.503604	0.104403
	Recommended Value⁵	4.4	17806	42994	71971	230428	4270	81430	33	16726	308	1317	87835	44	117	9.2	26	18.3	131	1.22	0.403
	Relative Deviation (%)	-7.30966	-6.46131	1.58714	5.85479	-1.07311	1.09778	5.17622	3.07955	3.29128	6.65179	0.0474563	-3.86449	2.41193	1.57051	-0.633152	1.35577	0.553279	-1.27863	-1.67828	6.14764
7	BIR-1G-1	3.583	13255	57511	83650	218467	197.1	99208	45.18	5800	333.3	1358	79420	53.16	180.2	0.1652	15.11	0.4785	6.303	0.0312			BIR-1G-1	0.261	8.869	0.187	0.7312	822.3	1.768	24.41	0.1156	1.382	0.02869	0.2854	4.111	0.1194	0.4742	0.16	0.009767	0.02634	0.1081	0.09147	0.08719
12	BIR-1G-2	3.481	13174	58147	85615	219529	188.4	95319	43.42	5743	323.1	1330	78555	51.79	169.8	0.1598	15.09	0.43	5.38	0.01711	0.07008		BIR-1G-2	0.2395	8.946	0.1761	0.9458	827.4	3.779	32.24	0.1226	1.375	0.02675	0.2509	3.13	0.1033	0.4617	0.1252	0.007575	0.02839	0.04396	0.09859	0.09398
20	BIR-1G-3	2.809	13409	58334	83406	219582	191.9	96003	43	5774	323.2	1345	80360	52.81	168.6	0.06081	15.39	0.3564	6.405	0.06654	0.02331		BIR-1G-3	0.2786	7.66	0.1605	1.05	693.8	2.408	32.59	0.1299	1.01	0.03139	0.3234	4.045	0.1103	0.2696	0.1491	0.01935	0.02763	0.1137	0.08822	0.08425
24	BIR-1G-4	3.358	13251	57817	83797	221529	187.3	95469	43.19	5746	316.8	1319	78184	51.32	167.3	0.1502	14.94	0.4972	6.179		0.01631		BIR-1G-4	0.2634	8.456	0.1767	0.7971	874.4	2.413	25.94	0.1626	1.318	0.02868	0.3122	3.493	0.09372	0.5023	0.1422	0.02021	0.02886	0.04478	0.09214	0.088
33	BIR-1G-5	3.342	13387	58468	82805	220224	189.7	96544	43.96	5768	324.6	1350	79406	52.22	167.1	0.1945	14.92	0.4222	6.177	0.06346	0.02373		BIR-1G-5	0.3211	8.517	0.208	1.18	826.7	2.255	35.36	0.1384	1.357	0.02738	0.2391	5.133	0.1099	0.4421	0.1525	0.02129	0.01151	0.04674	0.09347	0.08987
38	BIR-1G-6	2.527	13259	58023	85267	219269	190.7	96565	43.13	5724	324.7	1331	78233	51.43	171.2	0.1855	15.26	0.5306	5.27	0.01795	0.01982		BIR-1G-6	0.2384	9.381	0.1695	0.6922	983.7	2.872	34.3	0.1047	1.605	0.04022	0.2899	4.518	0.1099	0.4876	0.1105	0.0219	0.02368	0.1275	0.09617	0.09246
46	BIR-1G-7	3.546	13449	58020	84138	219690	190.1	96479	44.1	5737	326.2	1335	79052	52.91	167.7	0.1653	14.77	0.4703	5.533		0.01824		BIR-1G-7	0.2849	8.612	0.1918	1.187	919	3.198	25.77	0.1647	1.209	0.0222	0.2526	2.787	0.08065	0.3818	0.166	0.008019	0.03026	0.1229	0.09153	0.06541
51	BIR-1G-8	3.209	13205	57528	85421	220143	186.7	95869	42.39	5669	318.7	1319	78133	51.28	166.8	0.1566	14.65	0.4868	6.624		0.02332		BIR-1G-8	0.259	8.374	0.1487	1	941.9	3.705	24.32	0.1349	1.514	0.02398	0.2847	4.273	0.1233	0.5487	0.1285	0.02236	0.03182	0.04874	0.09627	0.0912
	Average	3.23188	13298.6	57981	84262.4	219804	190.238	96432	43.5463	5745.12	323.825	1335.88	78917.9	52.115	169.838	0.154739	15.0163	0.459	5.98388	0.039252	0.02783		Average	0.268238	8.60187	0.177287	0.947913	861.15	2.79975	29.3663	0.134175	1.34625	0.0286612	0.279775	3.93625	0.106309	0.446	0.14175	0.0163089	0.0260613	0.0820525	0.0934825	0.086545
	2SD	0.702943	190.583	650.24	1955.2	1655.09	6.11959	2280.98	1.59662	73.0783	9.309	26.4658	1473.68	1.43565	8.32162	0.0762249	0.459993	0.101461	0.959659	0.0432624	0.0348997
	Recommended Value⁶	3.203	13591	58429	82088	223392	190	94983	43.21	5747	320.6	1341	79736	52.22	168.9	0.21	15.6	0.553	6.75	0.0328	0.01051
	Relative Deviation (%)	0.901499	-2.15124	-0.766743	2.64883	-1.60609	0.125	1.52554	0.778176	-0.0326257	1.00593	-0.382177	-1.02604	-0.201072	0.555062		-3.74199		-11.35
5	TB-1G-1	17.51	23483	21102	92395	251755	35927	51158	23.44	5502	194.9	1480	65852	24.37	18	150.5	25.32	29.52	970.6	16.2	4.693		TB-1G-1	0.1378	7.939	0.1516	0.5898	691	1.866	29.05	0.1126	1.096	0.02421	0.2546	3.111	0.09866	0.3785	0.1227	0.005931	0.02223	0.09126	0.07719	0.07358
10	TB-1G-2	18.5	24877	22345	88261	249295	37670	53866	24.52	5751	206.1	1517	67736	25.16	19.52	153.2	25.23	29.67	998	17.65	5.15		TB-1G-2	0.2465	7.773	0.1519	0.8181	835.3	1.926	23.56	0.1277	1.103	0.02257	0.3186	3.887	0.09153	0.4636	0.1347	0.01683	0.02378	0.09764	0.08259	0.07872
18	TB-1G-3	17.43	23799	22067	93560	250937	36116	50312	21.73	5369	192.3	1432	64761	23.96	16.13	142.4	24.57	29.22	947.7	14.64	4.147		TB-1G-3	0.1916	7.658	0.137	0.7584	740.8	2.823	25.87	0.1235	0.9776	0.02168	0.2565	4.42	0.1026	0.3785	0.1186	0.01669	0.008986	0.03697	0.07607	0.07265
25	TB-1G-4	17.57	23606	21638	94824	251610	35426	50131	21.37	5340	185.5	1430	63474	23.72	16.64	144.6	24.14	29.65	964.5	15.69	4.592		TB-1G-4	0.2573	8.173	0.1973	0.7731	716.7	1.678	19.32	0.1279	1.248	0.02281	0.2448	2.778	0.1075	0.5243	0.1259	0.006545	0.02478	0.03845	0.07912	0.07556
32	TB-1G-5	18.39	23974	21812	93648	250812	36321	50480	21.48	5382	189.1	1449	64739	24.13	17.66	145.5	24.12	28.98	967.3	15.33	4.215		TB-1G-5	0.2208	8.983	0.2207	0.5667	807.1	2.34	22.88	0.1009	1.244	0.02186	0.1844	2.652	0.08974	0.4431	0.1607	0.01793	0.009694	0.03937	0.07873	0.0757
37	TB-1G-6	16.87	23484	21423	95736	252647	35152	50055	21.78	5224	185.9	1411	61689	23.56	16.18	144.9	24.74	28.61	947.2	14.57	3.844		TB-1G-6	0.2439	6.929	0.1544	0.9293	713	2.295	20.22	0.1116	0.8299	0.02663	0.2236	3.585	0.0904	0.4076	0.1098	0.01798	0.02578	0.1047	0.07895	0.07591
44	TB-1G-7	19.04	24391	21775	93044	251908	36781	50999	21.72	5386	192.6	1440	62495	24.03	17.23	146.8	24.87	29.17	961.4	16.2	4.383		TB-1G-7	0.201	8.141	0.1522	0.8221	664.2	2.625	19.73	0.09956	1.542	0.02729	0.2167	2.894	0.06856	0.51	0.1381	0.01418	0.02676	0.1087	0.08095	0.07669
49	TB-1G-8	18.14	23672	21625	92945	252864	36092	50415	21.05	5388	190.3	1429	63214	23.93	17.11	144.6	24.71	29.87	957.5	15.24	4.008		TB-1G-8	0.2764	8.81	0.137	0.6682	644.7	2.117	21.26	0.124	1.076	0.01954	0.2202	4.1	0.1077	0.4314	0.1424	0.01872	0.02663	0.1082	0.08057	0.07633
	Average	17.9312	23910.8	21723.4	93051.6	251478	36185.6	50927	22.1363	5417.75	192.088	1448.5	64245	24.1075	17.3087	146.562	24.7125	29.3362	964.275	15.69	4.379		Average	0.221913	8.05075	0.162763	0.740712	726.6	2.20875	22.7362	0.11597	1.13956	0.0233237	0.239925	3.42837	0.0945862	0.442125	0.131613	0.0143507	0.02108	0.0781613	0.0792712	0.0756425
	2SD	1.32142	920.795	710.04	4144.51	2129.36	1466.64	2337.78	2.24109	289.211	12.2141	63.867	3642.31	0.918246	2.07934	6.65352	0.825091	0.7823	30.0586	1.8776	0.788355
	Recommended Value⁷	17.58	23000	21060	87353	251067	36760	58820	22.6	5176	199	1394	67433	23.2	17.6	151	23.4	27.7	939	13.8	4.08
	Relative Deviation (%)	1.99801	3.95978	3.14993	6.52367	0.1639	-1.5625	-13.4189	-2.05199	4.6706	-3.47362	3.90961	-4.72766	3.91164	-1.65483	-2.93874	5.60897	5.90704	2.69169	13.6957	7.32843
	References
	[1] Preferred Values, Silicate Glass, NIST SRM 610, GeoRem Database, http://georem.mpch-mainz.gwdg.de/ref_mat_pref_val.asp?refmatid=NIST+NISTSRM610
	[2] Preferred Values, Silicate Glass, NIST SRM 612, GeoRem Database, http://georem.mpch-mainz.gwdg.de/ref_mat_pref_val.asp?refmatid=NIST+NISTSRM612
	[3] Preferred Values, Silicate Glass, NIST SRM 614, GeoRem Database, http://georem.mpch-mainz.gwdg.de/ref_mat_pref_val.asp?refmatid=NIST+NISTSRM614
	[4] Preferred Values, Basalt Glass, USGS BCR-2G, GeoRem Database, http://georem.mpch-mainz.gwdg.de/ref_mat_pref_val.asp?refmatid=USGS+BCR-2G
	[5] Preferred Values, Basalt Glass, USGS BHVO-2G, GeoRem Database, http://georem.mpch-mainz.gwdg.de/ref_mat_pref_val.asp?refmatid=USGS+BHVO-2G
	[6] Preferred Values, Basalt Glass, USGS BIR-1G, GeoRem Database, http://georem.mpch-mainz.gwdg.de/ref_mat_pref_val.asp?refmatid=USGS+BIR-1G
	[7] Information Values, Basalt Glass, USGS TB-1G, Wu et al., (2019), https://doi.org/10.1111/ggr.12301

## Sheet: Table2
Table 2. Relative deviations of NIST SRM 614 and USGS BIR-1G concentrations from recommended values at ablation area ranging from 50 to 500 μm
Sample ID	Sample Name	Li	Na	Mg	Al	Si	K	Ca	V	Mn	Co	Ga	Ge	As	Rb	Y	Nb	Zr	Mo	Ag	Cd	Sn	Cs	Ba	Yb	Hf	Ta	W	Pt	Au	Pb	Th	U		Detection Limit	Li	Na	Mg	Al	Si	K	Ca	V	Mn	Co	Ga	Ge	As	Rb
		ppm	ppm	ppm	ppm	ppm	ppm	ppm	ppm	ppm	ppm	ppm	ppm	ppm	ppm	ppm	ppm	ppm	ppm	ppm	ppm	ppm	ppm	ppm	ppm	ppm	ppm	ppm	ppm	ppm	ppm	ppm	ppm			ppm	ppm	ppm	ppm	ppm	ppm	ppm	ppm	ppm	ppm	ppm	ppm	ppm	ppm
NIST SRM 614 Recommended Value¹		1.69	101635	33.8	10797	337028	30	85049	1.01	1.42	0.79	1.31	0.942	0.74	0.855	0.79	0.824	0.848	0.8	0.42	0.56	1.68	0.664	3.2	0.777	0.711	0.808	0.806	2.36	0.48	2.32	0.748	0.823
USGS BIR-1G Recommended Value²		3.203	13591	58429	82088	223392	240.7	94983	326	1341	52.22	15.46	1.46		0.21	15.6	0.553	14.8	0.075		0.077	0.701	0.007	6.75	1.631	0.5822	0.0414	0.027	0.92		3.7	0.0328	0.023
Spot Size = 50 µm
2	NIST-614-1	1.726	101024	32.95	10714	337808	33.63	85415	0.9769	1.092	0.6846	1.239	0.9256	0.914	0.7607	0.6293	0.6493	0.7781	0.7568	0.6391	0.5654	1.838	0.6669	2.86	0.7289	0.8019	0.5546	0.6238	2.021	0.8066	1.632	0.6383	0.7413		NIST-614-1	0.2158	7.666	0.1354	0.2597	394.6	1.151	32.44	0.04674	0.4177	0.06489	0.05038	0.3449	0.5561	0.09264
3	NIST-614-2	1.427	101610	33.13	10942	336367	32.13	86594	0.8696	0.9396	0.5827	1.347	0.6797	0.5408	0.7716	0.6273	0.8041	0.5247	0.8406	0.3549	0.35	2.279	0.8628	3.315	0.5575	0.3127	0.6835	0.6334	3.255	0.7452	1.988	0.7904	0.7043		NIST-614-2	0.2713	7.069	0.2034	0.2931	476.6	1.899	34.77	0.02425	0.4278	0.06213	0.0384	0.3098	0.5982	0.1229
4	NIST-614-3	1.419	100804	33.18	10688	338296	30.88	85075	0.8934	0.7772	0.6519	1.304	0.6904	0.4293	0.6338	0.6888	0.7734	0.5393	0.5382	0.4107	0.9925	1.996	0.412	2.993	0.7696	0.5535	0.6308	0.687	2.808	0.5394	1.653	0.8086	0.7374		NIST-614-3	0.2692	6.494	0.1303	0.2392	392.4	1.539	30.8	0.02338	0.3987	0.07429	0.03828	0.2675	0.6678	0.1214
5	NIST-614-4	1.278	100823	33.5	10601	339599	32.47	83075	0.9617	1.164	0.6685	1.393	0.5674	1.111	0.7278	0.7124	0.746	0.3685	0.594	0.3392		2.576	0.6112	3.085	0.5719	0.5868	0.673	0.7939	1.428	0.6518	2.378	0.5533	0.5129		NIST-614-4	0.2473	7.278	0.1269	0.2621	406.1	2.251	33.45	0.0239	0.3842	0.09469	0.0288	0.3461	0.5756	0.09913
6	NIST-614-5	1.385	101221	31.37	10654	338055	33	85033	0.8515	1.089	0.6767	1.354	0.548	1.046	0.7098	0.6843	0.7857	0.3597	0.9703	0.3095	0.8158	1.469	0.2291	2.87	0.6747	0.6362	0.7234	0.6579	2.673	0.736	1.788	0.6792	0.6818		NIST-614-5	0.2098	6.618	0.1616	0.2964	463.1	2.108	31.25	0.02658	0.4038	0.07525	0.03344	0.2849	0.5152	0.1224
	Average	1.447	101096	32.826	10719.8	338025	32.422	85038.4	0.91062	1.01236	0.65288	1.3274	0.68222	0.80822	0.72074	0.66842	0.7517	0.51406	0.73998	0.41068	0.680925	2.0316	0.5564	3.0246	0.66052	0.57822	0.65306	0.6792	2.437	0.6958	1.8878	0.69396	0.67554		Average	0.24268	7.025	0.15152	0.2701	426.56	1.7896	32.542	0.02897	0.40644	0.07425	0.03786	0.31064	0.58258	0.111694
	2SD	0.29857	596.521	1.49862	234.71	2068.4	1.84579	2265.93	0.0999061	0.276847	0.0734505	0.104908	0.269081	0.547356	0.0976182	0.0682524	0.109145	0.30395	0.316834	0.237712	0.487983	0.755166	0.435496	0.334632	0.167909	0.315696	0.114758	0.12276	1.28175	0.184889	0.551986	0.19088	0.16845
	Relative Deviation (%)	-14.3787	-0.529936	-2.88166	-0.715013	0.295821	8.07333	-0.0124634	-9.8396	-28.707	-17.357	1.32824	-27.5775	9.21892	-15.7029	-15.3899	-8.77427	-39.3797	-7.5025	-2.21905	21.5937	20.9286	-16.2048	-5.48125	-14.991	-18.6751	-19.1757	-15.732	3.26271	44.9583	-18.6293	-7.2246	-17.9174
3	BIR-1G-1	2.861	13532	64064	103703	243853	218.7	109894	354.7	1469	56.49	15.94	0.9116	0.728	0.1412	16.79	0.5763	15.4	0.03602	0.3267	0.1582	1.841	0.01509	7.547	2.098	0.6901	0.06489	0.07451	0.8021	0.4461	3.661	0.0585	0.01444		NIST-614-1	0.5654	31.86	0.5253	0.9254	728.2	4.159	116.4	0.1664	1.357	0.1387	0.1922	0.64	1.002	0.06404
4	BIR-1G-2	3.151	13458	63222	102478	244956	222.1	110887	360.5	1492	55.49	15.98	0.7738	0.6844	0.2287	16.83	0.5449	15.47	0.09307	0.1431	0	1.387	0.02193	7.447	1.701	0.6049	0.03165	0.02884	1.381	0.3423	3.02	0.03302	0.01425		NIST-614-2	0.5239	22.29	0.6707	0.8286	883.3	4.479	101.7	0.1656	1.447	0.08032	0.06486	0.6553	0.9853	0.0582
5	BIR-1G-3	3.981	13912	64058	102023	244072	223.5	111413	367.2	1533	58.07	16.85	1.398	1.217	0.1132	16.31	0.64	15.9	0.1685	0.1877	0.06455	0.9454	0.02501	7.545	1.744	0.7151	0.03935	0.05351	1.517	0.1994	3.536	0.02138	0.02552		NIST-614-3	0.4926	24.1	0.6469	0.8916	660	3.717	88.02	0.09771	1.538	0.115	0.1186	0.7172	0.9849	0.07633
6	BIR-1G-4	3.454	14271	65389	102618	241178	232.8	113066	379.6	1557	60.27	16.86	1.126	0.8958	0.1768	17.3	0.6705	16.47	0.1475	0.2949	0	1.755	0.02183	7.324	1.985	0.5363	0.05768	0.1108	0.9273	0.216	2.9	0.03094	0.02058		NIST-614-4	0.6164	21.05	0.6685	0.991	1223	3.661	102.3	0.1409	1.4	0.09965	0.1638	0.8623	0.9712	0.05961
7	BIR-1G-5	2.907	14508	65148	100123	243615	227.6	112745	377.3	1542	59.44	15.97	1.572	0.852	0.08957	17.24	0.6946	17.28	0.1051	0.2367	0.0524	1.53	0.02036	7.148	1.484	0.433	0.03608	0.04674	1.116	0.2383	2.428	0.02443	0.02078		NIST-614-5	0.7805	31.24	0.7996	1.117	1460	2.603	101.4	0.1059	1.842	0.1289	0.1474	0.6233	1.233	0.08383
	Average	3.2708	13936.2	64376.2	102189	243535	224.94	111601	367.86	1518.6	57.952	16.32	1.15628	0.87544	0.149894	16.894	0.62526	16.104	0.110038	0.23782	0.05503	1.49168	0.020844	7.4022	1.8024	0.59588	0.04593	0.06288	1.14868	0.28842	3.109	0.033654	0.019114		Average	0.59576	26.108	0.6622	0.95072	990.9	3.7238	101.964	0.135302	1.5168	0.112514	0.137372	0.69962	1.03528	0.068402
	2SD	0.825874	815.689	1588.04	2341.91	2525.17	9.71317	2351.84	19.0732	65.7097	3.55529	0.874071	0.592167	0.375086	0.0979606	0.715832	0.112878	1.40175	0.0921398	0.13459	0.115925	0.633852	0.0065023	0.302124	0.434321	0.206401	0.0259504	0.0561327	0.536527	0.186434	0.895498	0.0262423	0.00855413
	Relative Deviation (%)	2.11677	2.53992	10.1785	24.4871	9.0168	-6.54757	17.4958	12.8405	13.2438	10.9766	5.56274	-20.8027		-28.6219	8.29487	13.0669	8.81081	46.7173		-28.5325	112.793	197.771	9.66222	10.5089	2.34971	10.942	132.889	24.8565		-15.973	2.60366	-16.8957
Spot Size = 100 µm
2	NIST-614-1	1.661	100738	33.28	10665	338510	29.79	85422	0.9699	1.37	0.7211	1.384	0.9451	0.6524	0.8663	0.7432	0.7943	0.7911	0.7163	0.3966	0.4819	1.907	0.5899	3.304	0.6042	0.5952	0.7582	0.6937	2.356	0.3333	2.369	0.6943	0.8835		NIST-614-1	0.03129	1.765	0.02341	0.05005	78.92	0.323	5.621	0.004698	0.03882	0.01119	0.005458	0.04037	0.1065	0.01868
3	NIST-614-2	1.671	101076	33.25	10634	338480	29.12	85182	0.9897	1.315	0.7568	1.366	0.7904	0.6411	0.8382	0.7641	0.8042	0.8398	0.6828	0.2915	0.2793	2.096	0.6319	3.221	0.626	0.6021	0.7486	0.7389	2.429	0.3536	2.274	0.6356	0.7469		NIST-614-2	0.04331	1.417	0.02639	0.05391	67.5	0.335	5.526	0.003978	0.05031	0.0106	0.004419	0.03596	0.07243	0.01913
4	NIST-614-3	1.733	101435	33.04	10564	338220	29.3	85286	0.9623	1.338	0.739	1.245	0.9033	0.5051	0.8151	0.7089	0.7646	0.7856	0.709	0.3667	0.3751	1.717	0.661	3.216	0.5775	0.5045	0.6696	0.6496	2.096	0.4723	2.149	0.7021	0.7927		NIST-614-3	0.03651	1.796	0.03066	0.04547	77.64	0.3032	4.309	0.004771	0.05948	0.01621	0.005517	0.04209	0.08806	0.01825
5	NIST-614-4	1.72	101941	32.79	10716	338446	29.22	84292	1.019	1.422	0.737	1.343	0.8795	0.5535	0.8718	0.7232	0.7882	0.8493	0.7551	0.3475	0.4205	1.939	0.5982	2.926	0.6898	0.5175	0.7029	0.5832	1.97	0.3799	2.374	0.7392	0.7449		NIST-614-4	0.03285	1.615	0.02306	0.0416	329	0.3243	5.894	0.00386	0.04691	0.01366	0.004807	0.04245	0.07641	0.01667
6	NIST-614-5	1.616	101806	32.6	10632	338168	29.3	84923	1.007	1.322	0.7402	1.335	0.9301	0.617	0.7993	0.7146	0.758	0.8187	0.6337	0.3518	0.529	1.661	0.6105	3.022	0.5804	0.4964	0.6941	0.6351	2.034	0.3699	2.368	0.7125	0.8495		NIST-614-5	0.03947	1.597	0.02782	0.05306	568.3	0.3503	5.603	0.00481	0.04	0.01506	0.006368	0.03712	0.08448	0.02137
	Average	1.6802	101399	32.992	10642.2	338365	29.346	85021	0.98958	1.3534	0.73882	1.3346	0.88968	0.59382	0.83814	0.7308	0.78186	0.8169	0.69938	0.35082	0.41716	1.864	0.6183	3.1378	0.61558	0.54314	0.71468	0.6601	2.177	0.3818	2.3068	0.69674	0.8035		Average	0.036686	1.638	0.026268	0.048818	224.272	0.32716	5.3906	0.0044234	0.047104	0.013344	0.0053138	0.039598	0.085576	0.01882
	2SD	0.0846017	895.303	0.526331	99.0063	283.753	0.46331	798.995	0.0429	0.0783796	0.0226721	0.0960217	0.108998	0.112076	0.0563232	0.0406198	0.035341	0.0507759	0.0803607	0.0685789	0.173171	0.315108	0.0512223	0.281324	0.0821433	0.0917458	0.0671659	0.105782	0.363763	0.0958455	0.174601	0.0682584	0.110527
	Relative Deviation (%)	-0.579882	-0.232007	-2.39053	-1.43373	0.396644	-2.18	-0.0329222	-2.02178	-4.69014	-6.47848	1.87786	-5.55414	-19.7541	-1.97193	-7.49367	-5.11408	-3.66745	-12.5775	-16.4714	-25.5071	10.9524	-6.88253	-1.94375	-20.7748	-23.609	-11.5495	-18.1017	-7.75424	-20.4583	-0.568966	-6.85294	-2.36938
3	BIR-1G-1	3.768	15136	66051	94426	250634	235.8	108205	364	1520	58.69	17.52	1.292	0.0492	0.1993	17.17	0.5692	16.35	0.1017	0.3075	0.05615	1.385	0.01123	7.64	1.757	0.62	0.04419	0.02341	1.8	0.8637	3.343	0.02697	0.04804		NIST-614-1	0.1953	8.311	0.2552	0.3217	234.8	0.7921	32.5	0.04327	0.2998	1.594	0.03056	0.2571	0.3123	0.02562
4	BIR-1G-2	3.546	15287	66494	95748	248761	237.4	108633	366.1	1532	59.24	17.15	1.815	0.05669	0.2081	17.47	0.6081	16.63	0.09924	0.3209	0.07352	1.242	0.01445	7.445	1.931	0.6073	0.05156	0.05158	1.532	0.9576	3.607	0.02238	0.03922		NIST-614-2	0.2556	6.755	0.3235	0.2523	314.7	1.054	25.2	0.03535	0.3123	0.05391	0.03567	0.2171	0.3219	0.01776
5	BIR-1G-3	3.787	15441	66898	96752	248200	238.4	107492	369	1527	59.74	17.28	1.355	0.1618	0.2048	17.48	0.6222	16.71	0.1168	0.3432	0.101	1.438	0.01124	7.736	1.83	0.583	0.03871	0.03911	1.674	1.067	3.555	0.03593	0.03713		NIST-614-3	0.1755	7.29	0.3778	0.2463	313.6	1.08	18.38	0.0313	0.293	0.04204	0.03042	0.1956	0.2235	0.02815
6	BIR-1G-4	3.717	15459	66666	96453	248890	237.8	107081	370.5	1525	59.64	17.16	1.785	0.2068	0.1843	17.59	0.6133	16.59	0.0991	0.4015	0.08249	1.431	0.01055	7.483	1.773	0.6207	0.03291	0.04775	1.969	0.9994	3.419	0.03471	0.03916		NIST-614-4	0.2133	8.863	0.2445	0.7517	332.9	1.306	26.05	0.03472	0.325	0.03526	0.04588	0.1813	0.2957	0.02309
7	BIR-1G-5	3.514	15579	67076	98250	247760	236.2	105881	370.4	1514	59.37	17.2	1.659	0.2897	0.1943	17.97	0.6685	17.1	0.09112	0.2258	0.08266	1.337	0.01415	7.636	1.794	0.5439	0.05688	0.04049	1.09	0.4945	3.311	0.04848	0.02994		NIST-614-5	0.2985	11.11	0.2678	0.5119	305	0.9962	28.48	0.04717	0.3209	0.03616	0.02973	0.1876	0.2651	0.03327
	Average	3.6664	15380.4	66637	96325.8	248849	237.12	107458	368	1523.6	59.336	17.262	1.5812	0.152838	0.19816	17.536	0.61626	16.676	0.101592	0.31978	0.079164	1.3666	0.012324	7.588	1.817	0.59498	0.04485	0.040468	1.613	0.87644	3.447	0.033694	0.038698		Average	0.22764	8.4658	0.29376	0.41678	300.2	1.04566	26.122	0.038362	0.3102	0.352274	0.034452	0.20774	0.2837	0.025578
	2SD	0.228297	306.917	707.405	2504.95	1960.16	1.95305	1911.83	5.10842	12.3028	0.739362	0.273759	0.435479	0.182666	0.0167617	0.515922	0.063588	0.487212	0.0167976	0.11388	0.0291423	0.144181	0.00327086	0.216122	0.124032	0.0579102	0.017215	0.0193768	0.597003	0.404039	0.232138	0.017841	0.0115558
	Relative Deviation (%)	14.4677	13.1661	14.0478	17.3446	11.3957	-1.48733	13.1344	12.8834	13.6167	13.627	11.6559	8.30137		-5.6381	12.4103	11.4394	12.6757	35.456		2.81039	94.9501	76.0571	12.4148	11.404	2.19512	8.33333	49.8815	75.3261		-6.83784	2.72561	68.2522
Spot Size = 200 µm
2	NIST-614-1	1.723	101716	33.28	10952	336972	29.69	86526	0.9864	1.412	0.7274	1.328	0.9457	0.6366	0.8493	0.7978	0.8074	0.8176	0.8035	0.4094	0.3892	1.501	0.6635	3.182	0.7405	0.6881	0.767	0.7413	2.252	0.4856	2.288	0.7467	0.8273		NIST-614-1	0.007597	2.149	0.005476	0.01124	9.055	0.06766	0.9908	0.0008623	0.007407	0.002384	0.001196	0.008012	0.02525	0.003972
3	NIST-614-2	1.717	101465	33.05	10974	337688	29.48	85648	1.003	1.41	0.7341	1.333	0.9162	0.7248	0.8499	0.7864	0.7854	0.8176	0.7693	0.4283	0.4491	1.643	0.6356	3.108	0.7729	0.6793	0.7865	0.7599	2.156	0.4926	2.329	0.7723	0.8201		NIST-614-2	0.008927	1.95	0.005463	0.01579	7.327	0.07622	0.9319	0.0009224	0.008452	0.004774	0.001255	0.00841	0.01676	0.003592
4	NIST-614-3	1.733	102015	33.08	11004	337063	29.72	86029	1.005	1.394	0.7152	1.311	0.9968	0.7533	0.8453	0.7912	0.8174	0.8586	0.8146	0.3959	0.4093	1.637	0.657	3.103	0.7683	0.6687	0.7692	0.6933	2.36	0.4912	2.32	0.7522	0.8144		NIST-614-3	0.00816	1.973	0.005261	0.0132	5.57	0.04591	0.804	0.0006712	0.01031	0.003495	0.001583	0.006547	0.01926	0.003748
5	NIST-614-4	1.718	101968	33.08	10908	337611	29.52	85349	1.002	1.392	0.7335	1.316	0.9628	0.6904	0.8547	0.8006	0.8084	0.8609	0.7738	0.4087	0.5037	1.796	0.6823	3.102	0.6959	0.707	0.7569	0.744	2.228	0.4697	2.32	0.7794	0.8387		NIST-614-4	0.008125	2.443	0.007877	0.01861	6.328	0.0725	1.131	0.0007998	0.008918	0.004351	0.001287	0.008579	0.01767	0.005291
6	NIST-614-5	1.686	102650	33.06	10958	337422	29.34	84902	1.001	1.371	0.7254	1.309	0.9615	0.6877	0.8563	0.807	0.8279	0.8321	0.8302	0.3985	0.4956	1.663	0.6651	3.198	0.7654	0.7009	0.7851	0.6859	2.31	0.4764	2.326	0.7475	0.8167		NIST-614-5	0.004842	2.507	0.006003	0.009194	5.99	0.05659	0.9436	0.0008282	0.008196	0.004236	0.001437	0.007159	0.0174	0.003712
	Average	1.7154	101963	33.11	10959.2	337351	29.55	85690.8	0.99948	1.3958	0.72712	1.3194	0.9566	0.69856	0.8511	0.7966	0.8093	0.83736	0.79828	0.40816	0.44938	1.648	0.6607	3.1386	0.7486	0.6888	0.77294	0.72488	2.2612	0.4831	2.3166	0.75962	0.82344		Average	0.0075302	2.2044	0.006016	0.0136068	6.854	0.063776	0.96026	0.00081678	0.0086566	0.003848	0.0013516	0.0077414	0.019268	0.004063
	2SD	0.0315113	791.814	0.171581	62.615	574.662	0.280571	1114.56	0.0133449	0.0296216	0.0136981	0.0189568	0.0523791	0.0785293	0.00791555	0.0143889	0.0281027	0.0380931	0.0469177	0.0228223	0.0908408	0.187369	0.0301657	0.0846414	0.0572973	0.0278912	0.0225972	0.0591833	0.139705	0.0175854	0.0294374	0.0271427	0.0175743
	Relative Deviation (%)	1.50296	0.322527	-2.04142	1.50227	0.0958971	-1.5	0.754624	-1.04158	-1.70423	-7.95949	0.717557	1.54989	-5.6	-0.45614	0.835443	-1.78398	-1.25472	-0.215	-2.81905	-19.7536	-1.90476	-0.496988	-1.91875	-3.65508	-3.12236	-4.33911	-10.0645	-4.18644	0.645833	-0.146552	1.55348	0.0534629
3	BIR-1G-1	3.496	15169	66060	94607	250930	225.9	107773	353.4	1497	58.41	17.13	1.698	0.06526	0.2304	17.6	0.6053	16.7	0.08923	0.188	0.1012	1.327	0.005021	7.67	1.902	0.6764	0.05592	0.01312	0.8317	0.2127	3.491	0.02937	0.02023		NIST-614-1	0.03395	0.6711	0.202	0.08809	38.87	0.1723	3.214	0.004773	0.02477	0.007382	0.002917	0.03808	0.08241	0.002611
4	BIR-1G-2	3.738	15323	65846	93267	252234	225.4	107665	357.3	1520	58.44	16.99	1.679	0.04096	0.2221	16.89	0.6163	16.06	0.08675	0.3172	0.06077	1.317	0.004471	7.529	1.755	0.6217	0.04432	0.01448	1.203	0.802	3.526	0.02597	0.02975		NIST-614-2	0.04279	1.126	0.4191	0.8099	34.63	0.1275	3.481	0.004628	0.04101	0.006224	0.002873	0.04842	0.08541	0.00267
5	BIR-1G-3	3.607	15404	65870	92895	252449	224.7	107750	360.3	1510	58.07	17.13	1.701	0.0674	0.2222	16.77	0.6065	15.86	0.09438	0.2994	0.06345	1.317	0.005924	7.489	1.809	0.6389	0.03256	0.01391	1.318	0.679	3.53	0.02738	0.02554		NIST-614-3	0.05387	0.7347	1.505	0.4768	33.21	0.1447	3.089	0.003565	0.04213	0.005913	0.004646	0.04262	0.04912	0.00315
6	BIR-1G-4	3.49	15109	65381	92843	253297	223.6	107380	357.3	1511	58.13	17.1	1.81	0.09517	0.2149	16.7	0.6201	15.9	0.08297	0.2516	0.1066	1.259	0.006994	7.25	1.74	0.5833	0.03426	0.01239	1.022	0.4054	3.478	0.02798	0.02494		NIST-614-4	0.03865	0.9744	0.472	0.1606	27.95	0.1537	3.652	0.007263	0.03085	0.009269	0.004752	0.05044	0.07972	0.003569
	Average	3.58275	15251.2	65789.2	93403	252228	224.9	107642	357.075	1509.5	58.2625	17.0875	1.722	0.0671975	0.2224	16.99	0.61205	16.13	0.0883325	0.26405	0.083005	1.305	0.0056025	7.4845	1.8015	0.630075	0.041765	0.013475	1.09367	0.524775	3.50625	0.027675	0.025115		Average	0.042315	0.87655	0.649525	0.383848	33.665	0.14955	3.359	0.00505725	0.03469	0.007197	0.003797	0.04489	0.074165	0.003
	2SD	0.202037	235.544	499.715	1428.21	1696.01	1.72627	313.046	4.89974	16.4012	0.328443	0.115217	0.103005	0.0384013	0.0109718	0.717356	0.0126186	0.674981	0.00828483	0.100066	0.0420068	0.0537401	0.00191261	0.302326	0.12689	0.0669472	0.0186534	0.00158193	0.368839	0.460739	0.0445505	0.00244133	0.00674964
	Relative Deviation (%)	11.8561	12.2158	12.5969	13.784	12.908	-6.56419	13.3276	9.53221	12.5652	11.5712	10.5272	17.9452		5.90476	8.91026	10.6781	8.98649	17.7767		7.7987	86.1626	-19.9643	10.8815	10.4537	8.22312	0.881643	-50.0926	18.8777		-5.23649	-15.625	9.19565
Spot Size = 300 µm
2	NIST-614-1	1.737	101986	33	10467	337507	30.74	86082	1.039	1.475	0.7657	1.368	0.9756	0.7504	0.859	0.7468	0.7982	0.8231	0.766	0.4082	0.4646	1.476	0.6511	3.169	0.7196	0.6921	0.7373	0.7387	2.517	0.5301	2.362	0.7474	0.8652		NIST-614-1	0.005104	2.472	0.003282	0.004931	2.965	0.04475	0.5425	0.0003479	0.004754	0.002333	0.0007019	0.004598	0.01108	0.001724
3	NIST-614-2	1.724	101291	33.18	10511	338875	30.4	84605	1.012	1.424	0.7393	1.329	0.9819	0.7211	0.8637	0.7482	0.797	0.8254	0.7914	0.4376	0.4163	1.553	0.6683	3.17	0.7287	0.6789	0.7493	0.7509	2.408	0.4823	2.294	0.7269	0.8372		NIST-614-2	0.00343	2.478	0.003195	0.01237	3.271	0.03876	0.5017	0.0004691	0.004495	0.003023	0.0006723	0.004614	0.00996	0.001659
4	NIST-614-3	1.704	101242	33.3	10458	339423	30.42	83881	1.002	1.425	0.7477	1.324	0.9416	0.7388	0.8585	0.7347	0.7971	0.832	0.8104	0.4188	0.4951	1.534	0.6737	3.219	0.7458	0.6654	0.7166	0.7504	2.43	0.4988	2.285	0.7158	0.8088		NIST-614-3	0.003229	2.706	0.001706	0.01563	3.272	0.03564	0.563	0.0003642	0.00409	0.003109	0.0005302	0.004721	0.006486	0.00186
5	NIST-614-4	1.648	101178	33.33	10446	340688	29.64	82052	0.9905	1.394	0.7183	1.289	0.9252	0.6744	0.8468	0.7524	0.7987	0.8196	0.7778	0.4376	0.5376	1.569	0.6789	3.239	0.7132	0.6489	0.7378	0.7559	2.361	0.5049	2.201	0.6916	0.8033		NIST-614-4	0.004141	3.578	0.002555	0.01309	3.041	0.03751	0.5719	0.0003269	0.004259	0.002924	0.0005626	0.004188	0.01267	0.00219
	Average	1.70325	101424	33.2025	10470.5	339123	30.3	84155	1.01087	1.4295	0.74275	1.3275	0.956075	0.721175	0.857	0.745525	0.79775	0.825025	0.7864	0.42555	0.4784	1.533	0.668	3.19925	0.726825	0.671325	0.73525	0.748975	2.429	0.504025	2.2855	0.720425	0.828625		Average	0.003976	2.8085	0.0026845	0.0115052	3.13725	0.039165	0.544775	0.000377025	0.0043995	0.00284725	0.00061675	0.00453025	0.010049	0.00185825
	2SD	0.0679908	653.585	0.259374	49.0816	2283.02	0.808455	2900.61	0.0358635	0.0581464	0.0340721	0.0560089	0.0470207	0.0579021	0.0124571	0.0131616	0.00144568	0.00905138	0.0330321	0.0252387	0.0884894	0.0703278	0.0209045	0.0611617	0.0245236	0.0320463	0.0235782	0.0126201	0.113181	0.0343504	0.114302	0.0402722	0.0494535
	Relative Deviation (%)	0.784024	-0.20736	-1.76775	-3.02399	0.621684	1	-1.05116	0.0866337	0.669014	-5.98101	1.33588	1.49416	-2.54392	0.233918	-5.62975	-3.18568	-2.70932	-1.7	1.32143	-14.5714	-8.75	0.60241	-0.0234375	-6.45753	-5.58017	-9.00371	-7.07506	2.92373	5.00521	-1.48707	-3.6865	0.683475
3	BIR-1G-1	3.394	14783	64064	95187	252814	220.6	106843	365.7	1498	57.49	16.79	1.565	0.04563	0.2259	16.32	0.5867	15.59	0.08302	0.3722	0.1106	1.154	0.004444	7.381	1.743	0.6214	0.03781	0.01373	1.797	0.7461	3.604	0.03071	0.02836		NIST-614-1	0.02333	4.165	0.0875	0.1181	14.61	0.08079	1.95	0.001472	0.0142	0.004861	0.001044	0.05343	0.09687	0.001895
4	BIR-1G-2	3.482	14458	63502	95453	253180	218.5	106903	368.3	1501	56.94	16.75	1.617	0.03506	0.2191	16.42	0.6079	15.55	0.08807	0.3245	0.1001	1.137	0.004411	7.245	1.769	0.6033	0.03947	0.03419	1.26	0.5326	3.392	0.02543	0.02146		NIST-614-2	0.03358	5.245	0.1151	0.558	18.13	0.122	1.65	0.002689	0.01225	0.004524	0.00282	0.03751	0.1017	0.00256
5	BIR-1G-3	3.444	14473	63415	95091	252990	219	107764	366.9	1507	57.29	16.83	1.683	0.05813	0.2175	16.58	0.5842	15.69	0.08306	0.3242	0.09608	1.119	0.006161	7.223	1.756	0.6187	0.03753	0.01225	1.416	0.6062	3.453	0.0316	0.02708		NIST-614-3	0.0346	5.595	0.4457	0.5162	15.6	0.1141	1.729	0.002576	0.02205	0.004866	0.002175	0.03987	0.07217	0.002534
	Average	3.44	14571.3	63660.3	95243.7	252995	219.367	107170	366.967	1502	57.24	16.79	1.62167	0.0462733	0.220833	16.44	0.592933	15.61	0.0847167	0.3403	0.10226	1.13667	0.00500533	7.283	1.756	0.614467	0.03827	0.0200567	1.491	0.6283	3.483	0.0292467	0.0256333		Average	0.0305033	5.00167	0.2161	0.397433	16.1133	0.10563	1.77633	0.00224567	0.0161667	0.00475033	0.002013	0.0436033	0.0902467	0.00232967
	2SD	0.072074	299.592	575.273	306.243	298.911	1.79134	841.47	2.12498	7.48331	0.454606	0.0653197	0.0965724	0.0188585	0.00728347	0.214165	0.0212643	0.117757	0.00474244	0.0451141	0.0122427	0.0285813	0.00163458	0.139752	0.0212289	0.0159452	0.00171239	0.020024	0.451105	0.177102	0.178221	0.00544628	0.0059938
	Relative Deviation (%)	7.39931	7.21311	8.95332	16.0263	13.2514	-8.86304	12.8307	12.5665	12.006	9.61318	8.60285	11.0731		5.15873	5.38462	7.22122	5.47297	12.9556		32.8052	62.1493	-28.4952	7.8963	7.66401	5.5422	-7.56039	-25.716	62.0652		-5.86486	-10.8333	11.4493
Spot Size = 400 µm
2	NIST-614-1	1.683	102214	31.68	10426	339596	28.9	81897	1.041	1.578	0.7621	1.326	0.9981	0.7554	0.88	0.6848	0.7538	0.8862	0.8117	0.4434	0.554	1.525	0.6788	3.185	0.7112	0.6756	0.7257	0.782	2.226	0.4905	2.257	0.7418	0.8087		NIST-614-1	0.002457	1.481	0.001499	0.005118	20.85	0.02152	0.3467	0.000249	0.002371	0.002216	0.000265	0.0049	0.007605	0.001326
3	NIST-614-2	1.668	103338	31.87	10607	338880	28.98	81692	1.046	1.558	0.7463	1.311	0.9784	0.7253	0.8602	0.6985	0.7394	0.851	0.8288	0.4347	0.5276	1.511	0.6973	3.2	0.6998	0.6978	0.7362	0.7634	1.972	0.5196	2.316	0.6929	0.7997		NIST-614-2	0.001963	1.178	0.001228	0.01145	19.07	0.02012	0.3432	0.0002818	0.00224	0.003041	0.0004146	0.00395	0.00877	0.001009
4	NIST-614-3	1.677	103326	31.9	10563	339414	28.57	80846	1.031	1.531	0.7458	1.288	0.9655	0.7029	0.8475	0.6848	0.745	0.8495	0.8051	0.4256	0.5719	1.546	0.6869	3.171	0.6743	0.6572	0.7334	0.7769	2.086	0.5499	2.282	0.6882	0.785		NIST-614-3	0.001978	2.069	0.001672	0.009049	24.17	0.02174	0.3843	0.0002674	0.002063	0.00204	0.0002722	0.002931	0.005867	0.0008533
	Average	1.676	102959	31.8167	10532	339297	28.8167	81478.3	1.03933	1.55567	0.7514	1.30833	0.980667	0.727867	0.862567	0.689367	0.746067	0.862233	0.8152	0.434567	0.551167	1.52733	0.687667	3.18533	0.6951	0.676867	0.731767	0.7741	2.09467	0.52	2.285	0.707633	0.7978		Average	0.00213267	1.576	0.00146633	0.008539	21.3633	0.0211267	0.358067	0.000266067	0.00222467	0.00243233	0.000317267	0.003927	0.007414	0.00106277
	2SD	0.0123288	1054.11	0.194822	154.151	607.705	0.354902	909.784	0.0124722	0.038517	0.0151376	0.0312552	0.0268101	0.0430195	0.0267464	0.0129165	0.0118539	0.0339161	0.019974	0.0145349	0.0363921	0.0287673	0.015144	0.0236831	0.0308532	0.0331981	0.00887894	0.0156946	0.207752	0.0485032	0.0483598	0.0484711	0.0195366
	Relative Deviation (%)	-0.828402	1.30303	-5.86785	-2.45439	0.673139	-3.94444	-4.19836	2.90429	9.55399	-4.88608	-0.127226	4.10474	-1.63964	0.88499	-12.7384	-9.45793	1.67846	1.9	3.46825	-1.57738	-9.0873	3.56426	-0.458333	-10.5405	-4.80075	-9.43482	-3.95782	-11.2429	8.33333	-1.50862	-5.39661	-3.06197
Spot Size = 500µm
2	NIST-614-1	1.692	101953	32.6	10635	338413	29.46	84153	1.083	1.575	0.7865	1.242	0.9867	0.6744	0.9009	0.734	0.7397	0.9077	0.8531	0.4444	0.5182	1.512	0.6588	3.281	0.7623	0.7604	0.8046	0.8329	2.521	0.4911	2.511	0.7883	0.9181		NIST-614-1	0.001048	0.7218	0.0006348	0.1156	12.96	0.01037	0.1761	0.000498	0.001124	0.001436	0.0002492	0.003726	0.006992	0.0004919
3	NIST-614-2	1.715	103532	33.19	10497	338080	29.47	83102	1.054	1.559	0.7712	1.247	0.9914	0.7023	0.9076	0.7051	0.7209	0.9119	0.85	0.4487	0.5449	1.496	0.6494	3.313	0.7562	0.7134	0.7653	0.784	2.422	0.495	2.393	0.7469	0.8389		NIST-614-2	0.001053	0.6902	0.0006493	0.08187	14.7	0.007912	0.1392	0.0001193	0.0007256	0.002241	9.301e-05	0.002581	0.005269	0.0006363
4	NIST-614-3	1.659	106152	32.71	10453	338498	28.65	80013	1.017	1.52	0.7527	1.202	0.981	0.7036	0.8819	0.6825	0.7136	0.8782	0.8425	0.453	0.5855	1.555	0.6773	3.35	0.7293	0.6652	0.7549	0.7803	2.195	0.4533	2.376	0.7229	0.8214		NIST-614-3	0.001215	0.6292	0.000407	0.05848	17.16	0.008998	0.1409	0.0001049	0.0008728	0.001669	0.0001125	0.002181	0.00489	0.0004352
	Average	1.68867	103879	32.8333	10528.3	338330	29.1933	82422.7	1.05133	1.55133	0.770133	1.23033	0.986367	0.693433	0.8968	0.7072	0.724733	0.899267	0.848533	0.4487	0.549533	1.521	0.661833	3.31467	0.749267	0.713	0.774933	0.799067	2.37933	0.4798	2.42667	0.7527	0.859467		Average	0.00110533	0.6804	0.0005637	0.0853167	14.94	0.00909333	0.152067	0.000240733	0.000907467	0.001782	0.00015157	0.00282933	0.005717	0.000521133
	2SD	0.0459662	3463.41	0.512337	155.068	360.763	0.768433	3514.17	0.0540206	0.0461976	0.0276388	0.0402768	0.00850464	0.0269381	0.0217703	0.0421543	0.0219893	0.0299895	0.00889994	0.00702187	0.0553395	0.0498264	0.0231806	0.0563875	0.028673	0.0777325	0.0428057	0.0479428	0.272931	0.0376117	0.12007	0.0540252	0.0841422
	Relative Deviation (%)	-0.0788955	2.2079	-2.85996	-2.48835	0.386417	-2.68889	-3.08802	4.09241	9.24883	-2.51477	-6.08142	4.70984	-6.29279	4.88889	-10.481	-12.0469	6.0456	6.06667	6.83333	-1.86905	-9.46429	-0.326305	3.58333	-3.56928	0.281294	-4.09241	-0.860215	0.819209	-0.0416667	4.5977	0.628342	4.43094
	References
	[1] Preferred Values, Silicate Glass, NIST SRM 614, GeoRem Database, http://georem.mpch-mainz.gwdg.de/ref_mat_pref_val.asp?refmatid=NIST+NISTSRM614
	[2] Preferred Values, Basalt Glass, USGS BIR-1G, GeoRem Database, http://georem.mpch-mainz.gwdg.de/ref_mat_pref_val.asp?refmatid=USGS+BIR-1G
[truncated: 18 more columns]

## Sheet: Table3
Table 3. Relative deviations of metal concentrations in meteorites from informational values at 50 and 200 μm laser ablation area
	Sample Name	Fe	Co	Ni	Cu	Ga	Ge	As	Ru	Rh	Pd	W	Re	Os	Ir	Pt	Au		Detection Limit	Fe	Co	Ni	Cu	Ga	Ge	As	Ru	Rh	Pd	W	Re	Os	Ir	Pt	Au
		ppm	ppm	ppm	ppm	ppm	ppm	ppm	ppm	ppm	ppm	ppm	ppm	ppm	ppm	ppm	ppm			ppm	ppm	ppm	ppm	ppm	ppm	ppm	ppm	ppm	ppm	ppm	ppm	ppm	ppm	ppm	ppm
Spot Size = 50 µm
2025-11-07	GebelKamil	798590	7158	193090	474.8	43.75	120	13.99	6.706	0.6617	3.151	0.3563	0.03822	0.2455	0.5357	2.718	1.446		GebelKamil	1.727	0.01863	0.1773	0.06734	0.01647	0.05726	0.3296	0.01303	0.005575	0.01589	0.01999	0.002348	0.003324	0.003729	0.0419	0.04008
2025-11-07	GebelKamil	788821	7323	202554	417	43.69	121.4	13.68	6.124	0.6416	3.247	0.3992	0.03195	0.2483	0.5926	3.454	1.515		GebelKamil	1.584	0.01963	0.1456	0.06454	0.02066	0.06271	0.3529	0.01412	0.004602	0.01868	0.01418	0.002563	0.002551	0.003034	0.04445	0.04198
2025-11-07	GebelKamil	806731	7505	184623	411.4	46.4	128.4	14.96	5.316	0.6552	3.357	0.3984	0.03391	0.2485	0.6024	4.038	1.735		GebelKamil	1.713	0.02034	0.427	0.07556	0.01541	0.08639	0.4968	0.01504	0.003933	0.01961	0.007381	0.002834	0.004035	0.00338	0.05319	0.065
2025-11-07	GebelKamil	797900	7593	193274	411.1	45.84	128.4	14.86	5.024	0.6578	3.403	0.3868	0.0389	0.2464	0.6521	3.627	1.638		GebelKamil	1.61	0.02985	0.2043	0.09327	0.01608	0.05791	0.4067	0.01127	0.006935	0.01974	0.015	0.002114	0.004225	0.004859	0.05494	0.05154
2025-11-07	GebelKamil	766867	7265	224555	419	44.64	119	13.84	5.316	0.6907	3.359	0.3961	0.02972	0.2291	0.5818	3.7	1.498		GebelKamil	1.097	0.02004	0.1818	0.1072	0.01663	0.05943	0.4575	0.01834	0.004592	0.02421	0.01742	0.003202	0.004555	0.003668	0.05935	0.04422
	Average	791782	7368.8	199619	426.66	44.864	123.44	14.266	5.6972	0.6614	3.3034	0.38736	0.03454	0.24356	0.59292	3.5074	1.5664		Average	1.5462	0.021698	0.2272	0.081582	0.01705	0.06474	0.4087	0.01436	0.0051274	0.019626	0.0147942	0.0026122	0.003738	0.003734	0.050766	0.048564
	2SD	27375.6	317.647	27396.1	48.534	2.18748	8.24194	1.07164	1.24697	0.0322741	0.183937	0.0322923	0.00709306	0.0146367	0.0747798	0.875872	0.210465
	Recommended Value¹		7500	198000	464	49	121	15.6	2.11	0.75	4.8	0.66	0.04		0.39	3.5	1.57
	Relative Deviation (%)		-1.74933	0.817778	-8.04741	-8.44082	2.01653	-8.55128	170.009	-11.8133	-31.1792	-41.3091	-13.65		52.0308	0.211429	-0.229299
Spot Size = 200 µm
2025-12-02	SikhoteAlin	937762	4970	56809	124.4	53.91	152.6	9.264	5.47	2.068	2.687	0.7521	0.002111	0.04781	0.02077	5.975	1.409		SikhoteAlin	6.456	0.03251	1.433	0.01215	0.001966	0.01148	0.03836	0.001777	0.0006958	0.001563	0.00257	0.0004908	0.000326	0.000428	0.008088	0.004419
2025-12-02	SikhoteAlin	940004	4870	54685	119.5	53.42	150.8	9.043	5.083	2.002	2.478	0.7131	0.001427	0.04936	0.02364	4.924	1.359		SikhoteAlin	5.97	0.04983	3.35	0.01041	0.00132	0.01102	0.02855	0.0008189	0.0009489	0.002949	0.001814	0.0002003	0.0005268	0.0003008	0.005081	0.003488
2025-12-02	SikhoteAlin	933488	4656	61399	129.3	50.25	155.1	8.536	5.027	1.896	2.625	0.6677	0.002493	0.04084	0.01763	4.406	0.985		SikhoteAlin	0.6015	0.006599	0.05769	0.01163	0.002186	0.00857	0.02528	0.001393	0.001666	0.005198	0.002843	0.0007008	0.0007152	0.0006512	0.01184	0.003067
2025-12-02	SikhoteAlin	935237	4877	59446	132.1	50.2	139.5	8.801	4.748	1.837	2.403	0.6398	0.001302	0.04017	0.01906	5.595	0.9734		SikhoteAlin	0.8703	0.6778	0.05077	0.00976	0.001679	0.01135	0.02672	0.002653	0.000544	0.004549	0.001662	0.0002116	0.0006547	0.0006003	0.007322	0.001833
	Average	936623	4843.25	58084.8	126.325	51.945	149.5	8.911	5.082	1.95075	2.54825	0.693175	0.00183325	0.044545	0.020275	5.225	1.1816		Average	3.47445	0.191685	1.22287	0.0109875	0.00178775	0.010605	0.0297275	0.00166048	0.000963675	0.00356475	0.00222225	0.000400875	0.000555675	0.000495075	0.00808275	0.00320175
	2SD	4947.49	230.18	5101.28	9.61704	3.45759	11.944	0.542916	0.514904	0.179752	0.226218	0.0858314	0.000979633	0.00816775	0.00447666	1.20862	0.406424
	Recommended Value²		4790	60300	117	53.7	158	9.4	6.1	2	2.3	0.74	0.03	0.02	0.024	5.5	1.049
	Relative Deviation (%)		1.11169	-3.67371	7.97009	-3.26816	-5.37975	-5.20213	-16.6885	-2.4625	10.7935	-6.3277	-93.8892	122.725	-15.5208	-5	12.6406
Spot Size = 200 µm
2025-12-02	Boguslavka	941712	4314	53396	145.1	55.32	186.4	3.699	27.37	2.822	1.766	3.397	2.568	18.13	24.75	29.32	0.4846		Boguslavka	7.622	0.04214	2.342	0.009357	0.002113	0.008223	0.03415	0.001764	0.00108	0.001503	0.001761	0.0004383	0.0002255	0.0002886	0.008029	0.003344
2025-12-02	Boguslavka	941887	4532	52964	149.2	56.26	173.3	3.744	28.18	2.835	1.692	3.527	2.49	18.27	25.18	36.93	0.6872		Boguslavka	5.822	0.03375	1.128	0.008874	0.001889	0.01038	0.02547	0.001151	0.0006512	0.002024	0.001772	0.0002816	0.000278	0.0003786	0.005135	0.002819
2025-12-02	Boguslavka	942328	4406	52672	145.2	56.58	171.5	3.554	26.8	2.677	1.538	3.378	2.38	17.92	24.89	30.84	0.614		Boguslavka	1.703	0.01555	0.1481	0.009274	0.001952	0.007765	0.02592	0.002986	0.0009757	0.005307	0.002369	0.0005406	0.0003478	0.0006648	0.004139	0.003705
2025-12-02	Boguslavka	943957	4417	51064	148	53.88	167.9	3.844	26.39	2.741	1.713	3.382	2.421	17.41	24.36	39.38	0.489		Boguslavka	1.638	0.01905	0.3894	0.01126	0.001204	0.01159	0.02528	0.002031	0.0005339	0.002195	0.002462	0.0002889	0.0006633	0.0006082	0.0105	0.002557
	Average	942471	4417.25	52524	146.875	55.51	174.775	3.71025	27.185	2.76875	1.67725	3.421	2.46475	17.9325	24.795	34.1175	0.5687		Average	4.19625	0.0276225	1.00188	0.00969125	0.0017895	0.0094895	0.027705	0.001983	0.0008102	0.00275725	0.002091	0.00038735	0.00037865	0.00048505	0.00695075	0.00310625
	2SD	1773.64	154.773	1762.81	3.55352	2.09771	13.9752	0.208731	1.34332	0.128112	0.169596	0.123215	0.14281	0.652744	0.590339	8.32839	0.171812
	Recommended Value³		4480	54600	140	59.2	180	4.01				3.33	2.405	20.24	25.9	31.5	0.523
	Relative Deviation (%)		-1.40067	-3.8022	4.91071	-6.23311	-2.90278	-7.47506				2.73273	2.48441	-11.4007	-4.26641	8.30952	8.73805
Spot Size = 200 µm
2025-12-03	GebelKamil	807559	8748	182770	483.7	46.67	136.6	12.39	3.832	0.6953	4.495	0.3939	0.03464	0.2404	0.4104	2.804	1.451		GebelKamil	1.418	0.006404	0.09865	0.01038	0.00102	0.01851	0.02758	0.002426	0.0004203	0.004288	0.001913	0.0008427	0.0007888	0.0007356	0.003882	0.002647
2025-12-03	GebelKamil	804701	7061	187380	455.5	45.74	120.3	12.35	3.866	0.6556	3.941	0.3552	0.03319	0.2225	0.3871	3.493	1.324		GebelKamil	1.53	0.01044	0.2622	0.007889	0.0008979	0.007785	0.01156	0.002436	0.0003932	0.002218	0.002061	0.0004358	0.001201	0.0007385	0.003898	0.003697
2025-12-03	GebelKamil	803392	7205	188473	465.4	46.23	127.9	13.46	4.301	0.7587	4.588	0.4265	0.0377	0.2517	0.4483	4.103	1.627		GebelKamil	3.86	0.02075	1.385	0.007707	0.0005573	0.007307	0.01476	0.0007274	0.0001372	0.003554	0.00423	0.0006439	0.0006313	0.0002129	0.001073	0.002066
	Average	805217	7671.33	186208	468.2	46.2133	128.267	12.7333	3.99967	0.7032	4.34133	0.391867	0.0351767	0.2382	0.415267	3.46667	1.46733		Average	2.26933	0.0125313	0.58195	0.00865867	0.000825067	0.0112007	0.0179667	0.00186313	0.0003169	0.00335333	0.00273467	0.0006408	0.0008737	0.000562333	0.002951	0.00280333
	2SD	3479.82	1527.17	4942.83	23.3632	0.759708	13.319	1.02818	0.427053	0.0849189	0.571226	0.0582872	0.0037598	0.0240438	0.0504413	1.06128	0.248474
	Recommended Value¹		7500	198000	464	49	121	15.6	2.11	0.75	4.8	0.66	0.04		0.39	3.5	1.57
	Relative Deviation (%)		2.28444	-5.95572	0.905172	-5.68707	6.00551	-18.3761	89.5577	-6.24	-9.55556	-40.6263	-12.0583		6.47863	-0.952381	-6.53928
Spot Size = 50 µm
2026-01-08	SikhoteAlin	928756	5091	65724	116.2	61.46	159.6	10.22	6.008	2.183	2.491	0.8195	0.002712	0.04196	0.01481	6.076	1.232		SikhoteAlin	0.7887	0.04961	0.0712	0.01857	0.005335	0.0173	0.03326	0.009274	0.0007235	0.01328	0.008313	0.001247	0.003788	0.00328	0.003865	0.006474
2026-01-08	SikhoteAlin	929734	5049	64782	116.7	62.24	162.8	10.91	6.319	2.214	2.597	0.9014	0.004859	0.06068	0.02623	6.038	0.9613		SikhoteAlin	0.8082	0.0155	0.4877	0.02129	0.004166	0.0204	0.03396	0.01294	0.001638	0.01901	0.01325	0.0026	0.00591	0.004916	0.01498	0.01088
2026-01-08	SikhoteAlin	929930	4986	64589	118.3	63.15	165.6	11.76	6.634	2.449	2.848	0.8744	0.0104	0.07029	0.02929	5.963	0.9822		SikhoteAlin	3.632	1.717	0.1851	0.06872	0.01192	0.04473	0.09402	0.02212	0.001468	0.03235	0.01535	0.004256	0.01013	0.004464	0.02541	0.0303
2026-01-08	SikhoteAlin	927103	4935	67526	119.8	64.95	167	10.89	6.23	2.416	2.652	0.9267	0.00351	0.06477	0.02986	6.036	1.054		SikhoteAlin	5.324	0.04958	0.4291	0.03062	0.004614	0.03109	0.049	0.00528	0.0006969	0.02667	0.009541	0.002354	0.008548	0.00206	0.022	0.01955
	Average	928881	5015.25	65655.2	117.75	62.95	163.75	10.945	6.29775	2.3155	2.647	0.8805	0.00537025	0.059425	0.0250475	6.02825	1.05737		Average	2.63823	0.457923	0.293275	0.0348	0.00650875	0.02838	0.05256	0.0124035	0.0011316	0.0228275	0.0116135	0.00261425	0.007094	0.00368	0.0165637	0.016801
	2SD	2237.17	119.049	2324.63	2.83019	2.60081	5.66657	1.09275	0.449512	0.23618	0.259349	0.0795579	0.00600721	0.0212889	0.0121393	0.0818092	0.213042
	Recommended Value²		4790	60300	117	53.7	158	9.4	6.1	2	2.3	0.74	0.03	0.02	0.024	5.5	1.049
	Relative Deviation (%)		4.70251	8.88101	0.641026	17.2253	3.63924	16.4362	3.2418	15.775	15.087	18.9865	-82.0992	197.125	4.36458	9.60455	0.798379
Spot Size = 50 µm
2026-01-08	GuadalupeY	932870	4720	61659	149.1	69.58	190.7	4.419	33.89	3.156	1.613	4.022	4.965	40.63	40.1	39.87	0.5547		GuadalupeY	1.259	0.006324	0.03691	0.01227	0.003897	0.01118	0.02226	0.007266	0.000501	0.01041	0.007267	0.002243	0.0009715	0.00257	0.003028	0.005773
2026-01-08	GuadalupeY	935552	4601	59138	138.6	63.31	172.1	3.785	30.34	2.714	1.429	3.663	4.489	42.09	43.82	40.87	0.602		GuadalupeY	0.8825	0.008828	0.05236	0.01901	0.002816	0.01252	0.02141	0.0111	0.000362	0.01632	0.005865	0.001027	0.001306	0.004218	0.01285	0.005315
2026-01-08	GuadalupeY	935733	4629	58800	143.8	66.22	182.4	4.513	33.9	3.181	1.795	4.209	5.685	49.54	49.43	39.38	0.4608		GuadalupeY	3.276	0.04477	0.6092	0.102	0.01211	0.05219	0.1423	0.03081	0.004241	0.04505	0.02787	0.0105	0.007612	0.01196	0.01908	0.03747
2026-01-08	GuadalupeY	932299	4601	62360	144.6	68.6	182.5	3.819	32.14	2.98	1.45	3.876	4.616	38.61	39.26	37.48	0.4836		GuadalupeY	0.9974	0.358	6.16	0.01924	0.002112	0.01666	0.02409	0.01434	0.0006764	0.005329	0.006996	0.0009876	0.00237	0.005594	0.004396	0.0107
	Average	934114	4637.75	60489.2	144.025	66.9275	181.925	4.134	32.5675	3.00775	1.57175	3.9425	4.93875	42.7175	43.1525	39.4	0.525275		Average	1.60373	0.104481	1.71462	0.03813	0.00523375	0.0231375	0.052515	0.015879	0.0014451	0.0192772	0.0119995	0.0036894	0.00306487	0.0060855	0.0098385	0.0148145
	2SD	3087.19	97.687	3089.9	7.45436	4.83941	13.1942	0.667751	2.94433	0.372898	0.294521	0.399856	0.929527	8.25648	8.02009	2.46345	0.112456
	Recommended Value⁴		4470	54000	136	60.2	182	4.01				3.52	4.52		42.6	37.2	0.534
	Relative Deviation (%)		3.7528	12.0171	5.90074	11.1752	-0.0412088	3.09227				12.0028	9.26438		1.29695	5.91398	-1.6339
	References
	[1] Information Values, Iron meteorite (ungrouped), Gebel Kamil, Wasson and Zhang (2011), https://doi.org/10.26022/ieda/112144
	[2] Information Values, Iron meteorite (IIAB), Sikhote-Alin, Wasson et al., (2007), https://doi.org/10.1016/j.gca.2006.09.032
	[3] Information Values, Iron meteorite (IIAB), Boguslavka, Wasson et al., (2007), https://doi.org/10.1016/j.gca.2006.09.032
	[4] Information Values, Iron meteorite (IIAB), Guadalupe y Calvo, Wasson et al., (2007), https://doi.org/10.1016/j.gca.2006.09.032
